# Supplementary material for: Optimization of the Design Configuration and Operation Strategy of Single-Pass Seawater Reverse Osmosis
Source: MDPI journal article supplement (doi:10.3390/membranes12111145), 2022-11-15
Supplement: s1 [file s1]

## Supplementary materials

# Optimization of the Design Configuration and Operation Strategy of Single-Pass Seawater Reverse Osmosis

Seung Ji Lim <sup>1,2</sup>, Seo Jin Ki <sup>3,\*</sup>, Jae-Lim Lim <sup>4</sup>, Kyunghyuk Lee <sup>4</sup>, Jihye Kim <sup>4</sup>, Jeongwoo Moon <sup>1</sup> and Joon Ha Kim <sup>1</sup>

<sup>1</sup>*School of Earth Sciences and Environmental Engineering, Gwangju Institute of Science and Technology (GIST), Gwangju 61005, Republic of Korea*

<sup>2</sup>*Center for Water Cycle Research, Korea Institute of Science and Technology (KIST), Seoul 02792, Republic of Korea*

<sup>3</sup>*Department of Environmental Engineering, Gyeongnam National University of Science and Technology, 33 Dongjin-ro, Jinju 52725, Republic of Korea*

<sup>4</sup>*Korea Water Resources Corporation (K-Water), Daejeon, Republic of Korea*

*\*Correspondence: seojinki@gnu.ac.kr; Tel.: +82-55-751-3341*

**Table S1.** Parameter values for the process constant permeate mode.

| Parameter                                                    | Value                 |
|--------------------------------------------------------------|-----------------------|
| SWRO model operating conditions                              |                       |
| Target recovery ratio (%)                                    | 38–42                 |
| Operation duration (days)                                    | 365                   |
| Membrane element properties                                  |                       |
| Intrinsic membrane resistance $R_m$ (m <sup>-1</sup> )       | $2.89 \times 10^{14}$ |
| Salt permeability coefficient $B$ (m/s)                      | $9.36 \times 10^{-9}$ |
| Spacer thickness $H$ (m)                                     | $8.64 \times 10^{-4}$ |
| Membrane channel width $w$ (m)                               | 37                    |
| Membrane channel length $L$ (m)                              | 1                     |
| Number of membrane elements in a pressure vessel             | 7                     |
| Hydrodynamic properties                                      |                       |
| Fouling potential of feedwater, $k_{fp}$ (m <sup>-2</sup> )  | $5.5 \times 10^{11}$  |
| Hydraulic dispersion coefficient $D$ (–)                     | $9.6 \times 10^{-9}$  |
| Friction coefficient due to the membrane spacer $k_{fr}$ (–) | 8                     |

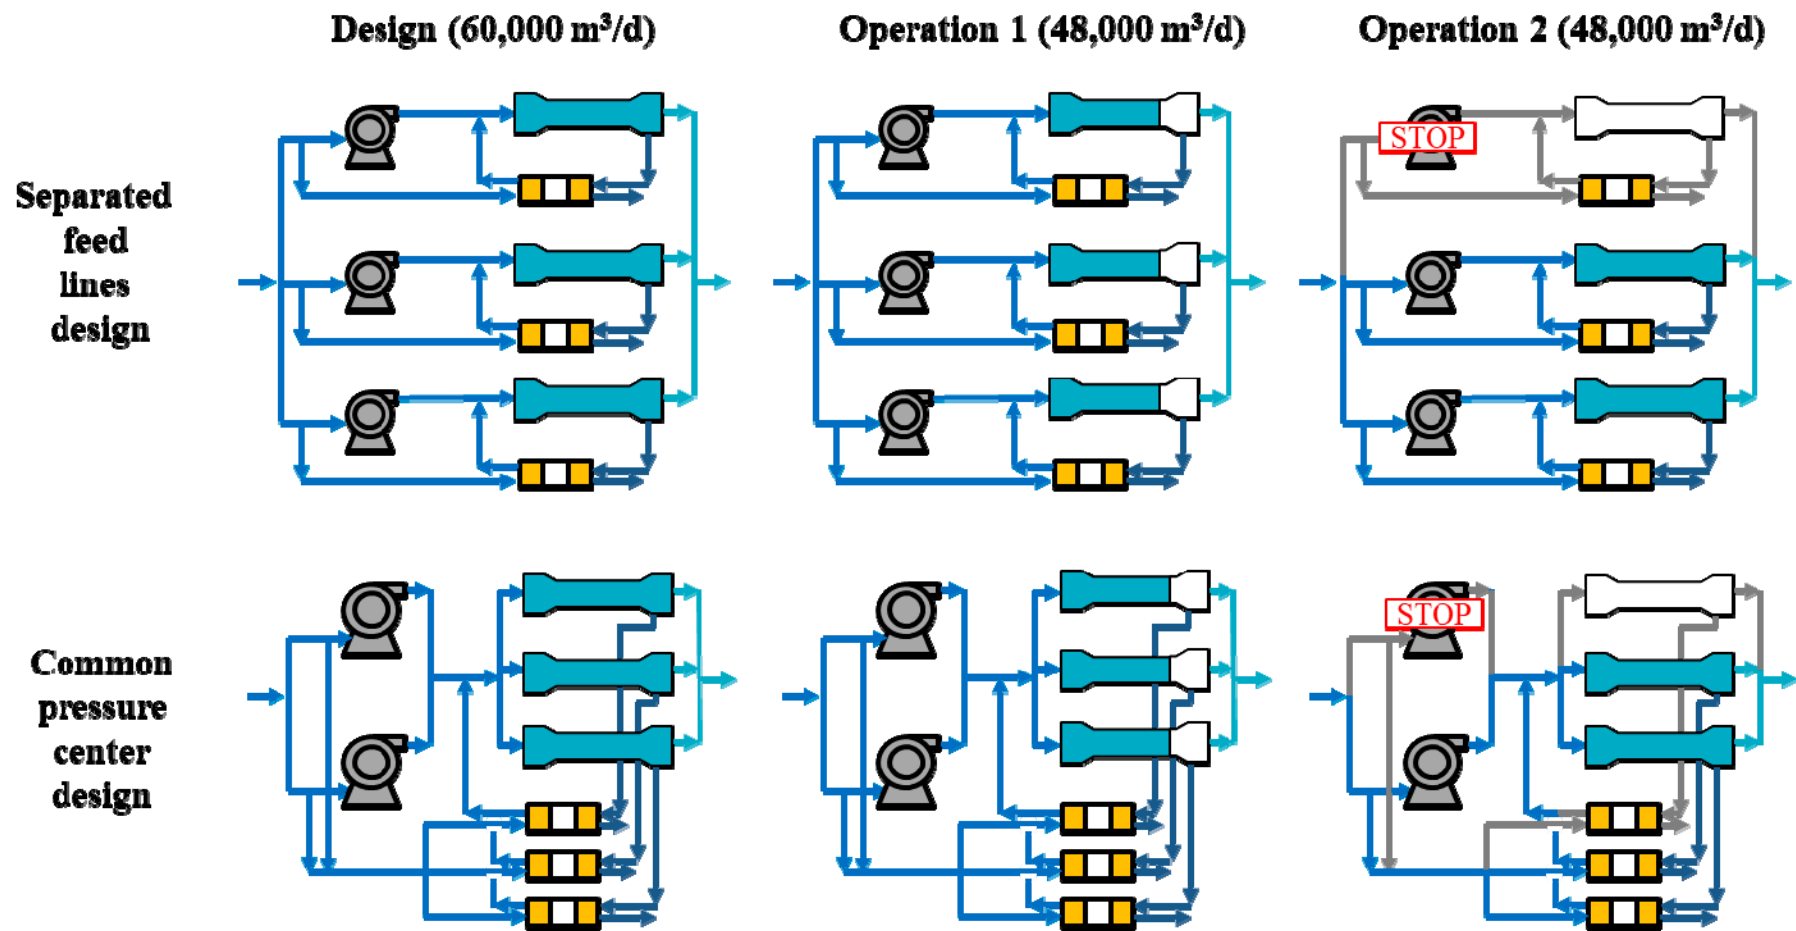

1

2 Figure S1. Graphical summary of design and operation configuration employed in this study.
